# Supplementary material for: Autoimmunity to synovial extracellular matrix proteins in patients with postinfectious Lyme arthritis
Source: JCI journal article supplement (doi:10.1172/jci161170), 2023-07-20
Supplement: sd1 [file 1]

## Supplemental data

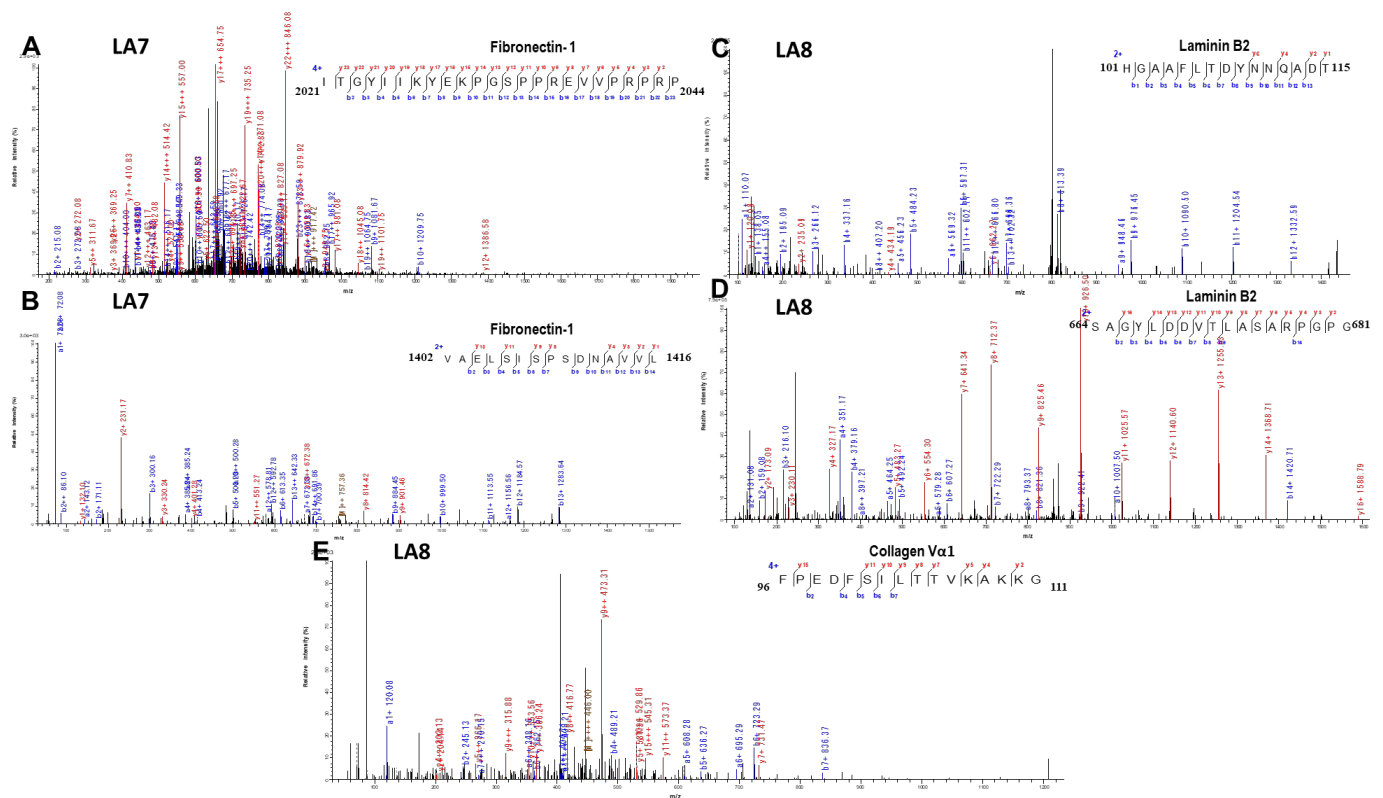

**Supplemental Figure 1. Tandem mass spectra for HLA-DR-presented, ECM peptides identified in synovial tissue of 2 LA post-infectious LA patients (LA7 and LA8).**

The peptide ITGYIIKYEKPGSPPREVVPRPRP was consistently identified from LA7 by OMSSA and X!Tandem from CID MS2 spectrum recorded using an LTQ-Orbitrap XL MS (A). VAELSISPSDNAVVL was consistently identified from LA7 by Mascot, OMSSA and X!Tandem from CID MS2 spectrum recorded using a 6550 QTOF MS (B). HGAFLTDYNNQADT was consistently identified from LA8 by Mascot, OMSSA, and X!Tandem from HCD MS2 spectrum recorded with a Q Exactive plus MS (C). SAGYLDDVTLASARPGPG was consistently identified from LA8 by Mascot, OMSSA, and X!Tandem from HCD MS2 spectrum recorded with a Q Exactive plus MS (D). FPEDFSILTTVKAKKG was consistently identified from LA8 by OMSSA and X!Tandem from CID MS2 spectrum recorded using a 6550 QTOF MS (E). The fragment ion error tolerance was 0.5 Da for data acquired on the LTQ-Orbitrap XL MS, 0.05 Da for data acquired on the 6550 QTOF MS, and 0.02 Da for data acquired on the Q Exactive plus MS.

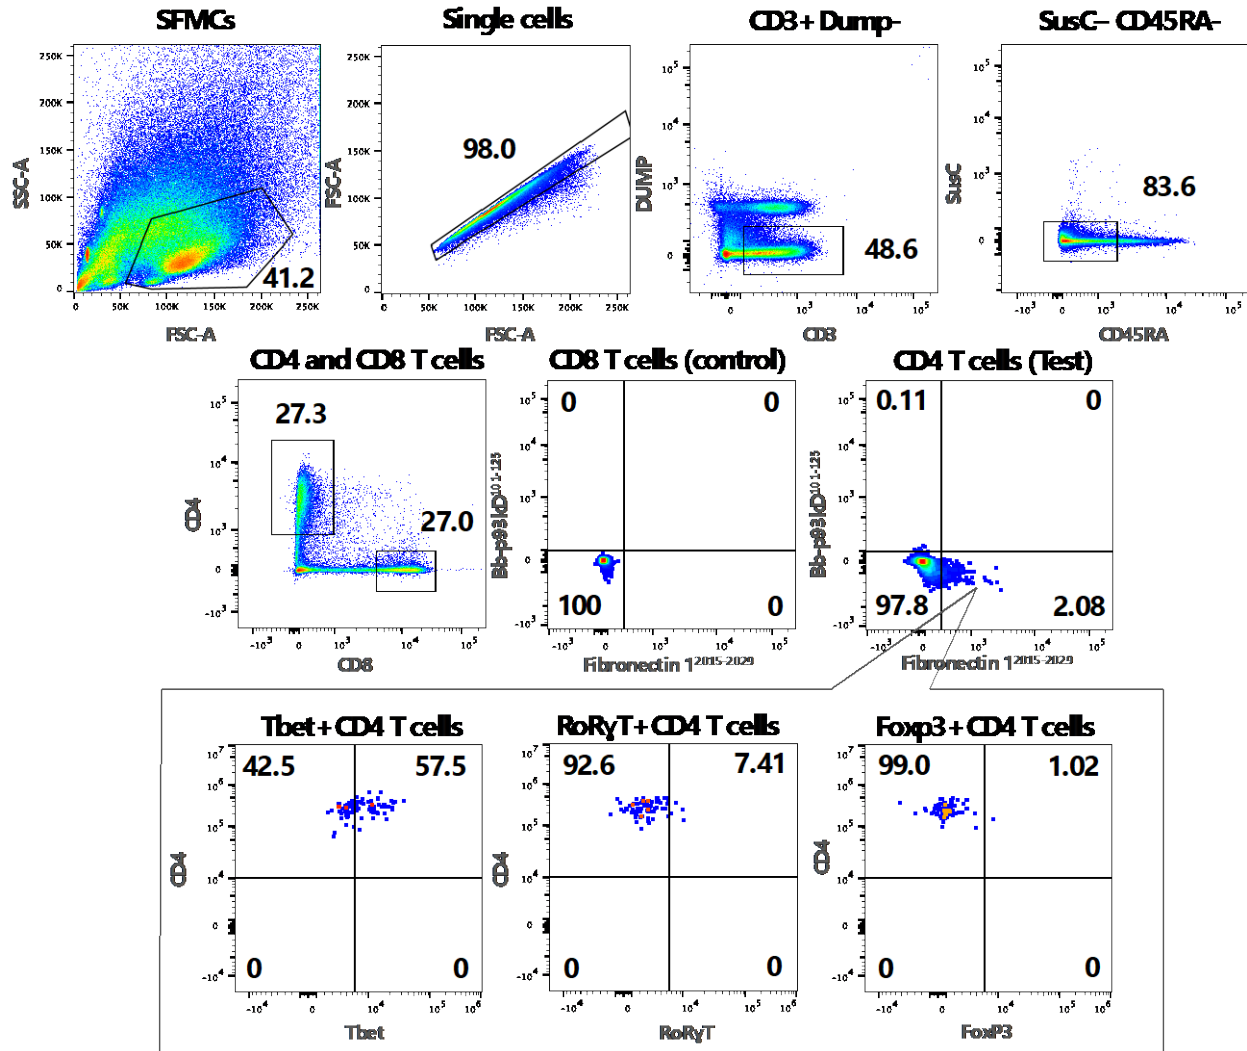

**Supplemental Figure 2. Gating strategy for T cell subset identification.**

The gating was started by SFMC followed by singlet cell using FSC and SSC; CD14, CD20 (Dump) negative CD3 positive T cells were gated, and the SusC negative-CD45RA- T cells were selected. Next, CD4 and CD8 T cells were gated for HLA-DR tetramers containing either the FLS or *Bb*-mimic peptide. For further intracellular protein analysis, T-bet, RoRyt and Foxp3 were analyzed in the FLS-specific T cell population.

**Supplemental Table 1. ECM peptides and putative Bb-mimic peptides**

| Pai<br>r<br>No. | Peptide name<br>(NCBI accession no.)                                                                                                                    | Sequence <sup>±</sup>                                                                                                                                     | Host-Bb<br>peptide<br>mimicry | HLA-DR alleles<br>predicted to bind both<br>host and Bb peptides                                               | HLA alleles in patients who had<br>responses to both the host and<br>Bb-peptides.                                                                                 |
|-----------------|---------------------------------------------------------------------------------------------------------------------------------------------------------|-----------------------------------------------------------------------------------------------------------------------------------------------------------|-------------------------------|----------------------------------------------------------------------------------------------------------------|-------------------------------------------------------------------------------------------------------------------------------------------------------------------|
| 1               | Fibronectin <sup>2019-2035</sup><br>(XP_005246454.1)<br>Bb-93kD <sup>101-125</sup><br>(CAA49829.1)                                                      | <sup>2019</sup> ARITGYIIKYEKPGSP <sup>2035</sup><br><sup>101</sup> LDSILNLRRLITGYIIKSFD <sup>125</sup><br>p-2,-1,1,2,3,4                                  | Unlikely                      | DRB1*15:01, *08:02, *07:01,<br>*13:02, DRB4*01:01                                                              | *Patient A: DRB1*15:01, *04:03                                                                                                                                    |
| 2               | Fibronectin <sup>2015-2019</sup><br>(XP_005246454.1)<br>Bb-93kD <sup>101-125</sup><br>(CAA49829.1)                                                      | <sup>2015</sup> QPPRARITGYIIKYE <sup>2029</sup><br><sup>101</sup> LDSILNLRRLITGYIIKSFD <sup>125</sup><br>p1, 5,6,7,8,9,10                                 | Possible                      | DRB1*15:01, *08:02, *07:01,<br>*13:02,                                                                         | *Patient A: DRB1*15:01, *04:03<br>Patient B: DRB1*15:01, *07:01                                                                                                   |
| 3               | Fibronectin <sup>1403-1416</sup><br>(XP_005246454.1)<br>Bb uncharacterized protein [CA8]<br><sup>9-23</sup><br>(EOA80158.1)                             | <sup>1403</sup> V A E L S I S P S D N A V V L <sup>1416</sup><br><sup>9</sup> I A I L L I S P S C S T N N N <sup>23</sup><br>p-4, -2, 1,2,3,4             | Unlikely                      | DRB1*08:02                                                                                                     | None                                                                                                                                                              |
| 4               | Fibronectin <sup>1996-2014</sup><br>(XP_005246454.1)<br>Bb-transcriptional activator,<br>putative, Baf family [JD1] <sup>163-177</sup><br>(>ADQ30717.1) | <sup>1996</sup> A P S N L R F L A T T P N S L L V S W <sup>2014</sup><br><sup>163</sup> I K K E P I S T P N S L L E R <sup>177</sup><br>p1, 5,6,7,8,9,10  | Possible                      | DRB1*07:01, *13:02                                                                                             | Patient B: DRB1*15:01, *07:01<br>Patient C: DRB1*15:01, *04:07                                                                                                    |
| 5               | Fibronectin <sup>2060-2076</sup><br>(XP_005246454.1)<br>Bb-exodeoxyribonuclease V<br>subunit beta <sup>334-351</sup><br>(>WP_002665669.1)               | <sup>2060</sup> Y T I Y V I A L K N N O K S E P L <sup>2076</sup><br><sup>334</sup> T I D Q N Y I I S N L K N Y L K S E <sup>351</sup><br>p3,4,5, 8,9,10  | Unlikely                      | DRB1*08:02, *11:01                                                                                             | None                                                                                                                                                              |
| 6               | Laminin B2 <sup>101-115</sup><br>(>AAA59492.1)<br>Bb-93kD <sup>694-708</sup><br>(CAA49829.1)                                                            | <sup>101</sup> H G A A F L T D Y N N O A D T <sup>115</sup><br><sup>694</sup> K N L V I L D V N T L K K V K <sup>708</sup><br>p4, 6                       | Unlikely                      | DRB1*03:01, *04:01,<br>DRB3*01:01                                                                              | Patient D: DRB1*04:08, *15:01                                                                                                                                     |
| 7               | Laminin B2 <sup>664-678</sup><br>(>AAA59492.1)<br>Bb- DUF685 domain-containing<br>protein <sup>180-194</sup><br>(WP_012663408)                          | <sup>664</sup> S A G Y L D D V T L A S A R P <sup>678</sup><br><sup>180</sup> N M E Y N D D V T L I F S K S <sup>194</sup><br>p1, 3,4,5,6,7               | Possible                      | DRB1*03:01, *04:01,<br>DRB3*01:01                                                                              | Patient B: DRB1*15:01, *07:01<br>Patient E: DRB1*01:01, *14:01<br>Patient F: HLA unknown                                                                          |
| 8               | Collagen Va1 <sup>96-111</sup><br>(EAW88132.1)<br>Bb-hypothetical protein<br>L144_03550 [CA382] <sup>116-130</sup><br>(WP_031558192.1)                  | <sup>96</sup> F P E D F S I L T T V K A K K G <sup>111</sup><br><sup>116</sup> D L D F S I L S S D S L K A K <sup>130</sup><br>p-1,1,1,2,3,4, 11          | Unlikely                      | DRB1*04:01, *01:01,<br>*07:01,                                                                                 | None                                                                                                                                                              |
| 9               | Collagen Va1 <sup>1730-1750</sup><br>(EAW88132.1)<br>Bb-Q62 <sup>71-85</sup><br>(>PNL87345.1)                                                           | <sup>1730</sup> G V V Q M T F L R L L S A S A H Q N V T Y <sup>1750</sup><br><sup>71</sup> Q A E V K L L S A S A S R F S <sup>85</sup><br>p1, 4,5,6,7,8,9 | Likely                        | DRB1*01:01, *04:01,<br>*04:05, *08:02, *09:01,<br>*12:01, *15:01, *07:01,<br>*11:01, DRB5*01:01,<br>DRB4*01:01 | Patient B: DRB1*15:01, *07:01<br>Patient C: DRB1*15:01, *04:07<br>Patient D: DRB1*04:08, *15:01<br>Patient G: DRB1*13:02, *13:03<br>Patient H: DRB1*03:01, *10:01 |
| 10              | Collagen Va1 <sup>1614-1630</sup><br>(EAW88132.1)<br>Bb- transcription elongation factor<br>GreA <sup>79-93</sup><br>(>WP_038377009.1)                  | <sup>1614</sup> M E E I F G S L N S L K L E I E Q <sup>1630</sup><br><sup>79</sup> Q Q F L T K R L N S L M L E I <sup>93</sup><br>p4,5,6,7, 9,10,11       | Unlikely                      | DRB1*07:01, *15:01                                                                                             | *Patient A: DRB1*15:01, *04:03                                                                                                                                    |

\*Patient A is LA7, the initial patient from whom the HLA-DR presented fibronectin peptides were identified in his synovial tissue.

<sup>±</sup>The location of the peptide in the protein is shown with superscript numbers. Matching same amino acids in the FLS-derived and Bb-mimic peptides are shown with a grey background. The predicted amino acids in the p1 through p9 locations in the HLA-DR binding groove are shown below the amino acid sequences.

**Supplementary Table 2. Antibodies for flow cytometry**

| <b>Protein/CD marker</b>                                                                                      | <b>Fluorescent</b> | <b>Clone</b>        |
|---------------------------------------------------------------------------------------------------------------|--------------------|---------------------|
| <b><i>Surface marker</i></b>                                                                                  |                    |                     |
| CD45RA (Biolegend)                                                                                            | FITC               | HI100               |
| CD3 (Biolegend)                                                                                               | APC-Alex700        | OKT3                |
| CD4 (Biolegend)                                                                                               | APC-Cy7            | RPA-T4              |
| CD8 (Biolegend)                                                                                               | BV510              | RPA-T8              |
| CD14 and CD20 (Biolegend) for dump staining                                                                   | PerCP-Cy5.5        | M5E2 and 2H7        |
| SusC (Moon's laboratory) for MHC negative gating                                                              | PE-Cy7             | N/A                 |
| MHC 1501 tetramer with fibronectin <sup>2015-2019</sup> or collagen V $\alpha$ I <sup>1730-1750</sup> peptide | APC                | N/A                 |
| MHC 1501 tetramer with <i>Bb</i> -mimic peptide of the fibronectin or collagen peptide                        | PE                 | N/A                 |
| Fc blocking reagent (BD)                                                                                      | -                  | 564220 <sup>#</sup> |
| <b><i>Intracellular marker</i></b>                                                                            |                    |                     |
| Foxp3 (Biolegend)                                                                                             | PE/Dazzle™ 594     | 206D                |
| Tbet (Biolegend)                                                                                              | PE/Dazzle™ 594     | 4B10                |
| RoRyt (BD)                                                                                                    | PE-CF594           | Q31-378             |

# Catalogue number.
